# Supplementary material
Source: PubMed Central journal article supplement (PMC1401508)
Supplement: nar_34_5_1450__1.pdf [file nar_34_5_1450__1.pdf]

## Supplementary Figures

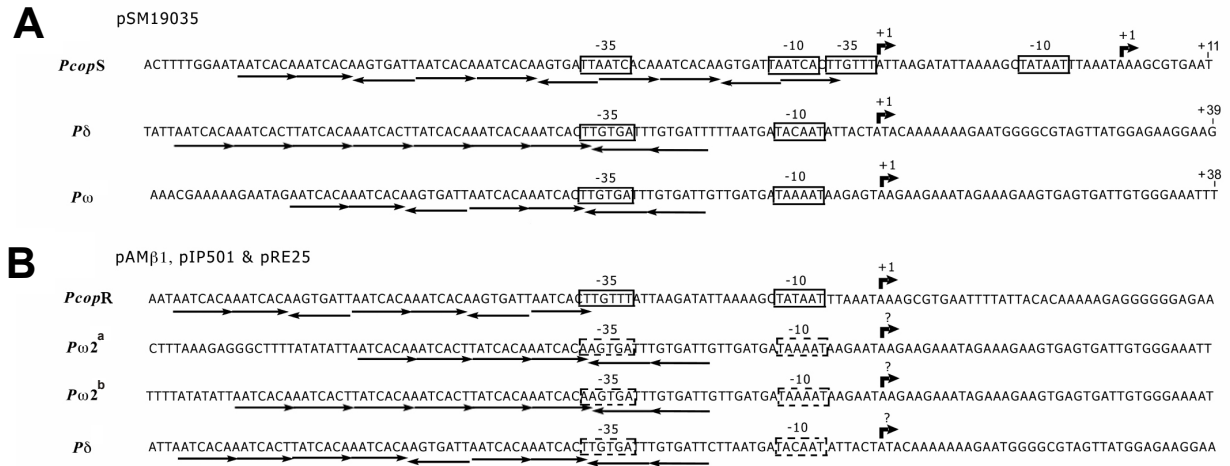

**Figure 9** Comparison of the nucleotide sequences of  $\omega_2$  targets sites in *incl8* plasmids. The experimentally defined conserved -35 and -10 consensus regions of the *PcopS*, *Pδ* and *Pω* promoters are boxed with a continuous line and with broken lines the putative region. Bent arrows and +1 denote known transcription start sites and bent arrows with a ?, putative start sites. Heptad repeats and their relative orientations indicated by arrows below the nucleotide sequences. In **(A)**, the prototype of  $\omega_2$  targets sites in pSM19035. In **(B)**,  $\omega_2$  target sites of *incl8* plasmids with different heptad organization. *PcopR* of pIP501; *Pω2<sup>a</sup>* of pAMβ1; *Pω2<sup>b</sup>* of pIP501 and the sequence of *Pδ* of pRE25.

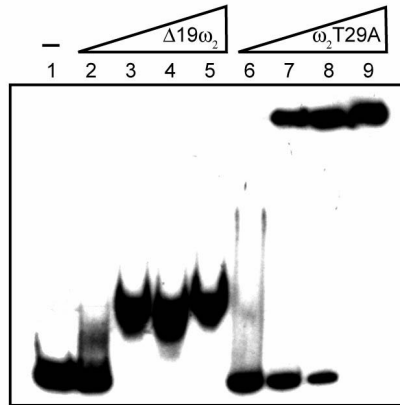

**Figure 10** Electrophoretic mobility shift assay (EMSA). 300-bp [ $\alpha^{32}$ P]-*HindIII-KpnI PcopS* DNA (labelled at the 3'-end of the bottom strand) (0.2 nM) and 1  $\mu$ g of poly[d(I-C)], as non-specific competitor DNA, were incubated with increasing concentrations of  $\Delta 19\omega_2$  or  $\omega_2$ T29A for 15 min at 37°C. The formed  $\omega_2$ -DNA complexes were analysed by EMSA. The  $\Delta 19\omega_2$  concentrations were 10, 20, 40, and 60 nM (lanes 2 to 5, respectively), and  $\omega_2$ T29A concentrations were 1, 2, 4.5 and 9  $\mu$ M (lanes 6 to 9 indicating unspecific binding of  $\omega_2$ T29A to DNA). The symbol – (lane 1) denotes the absence of protein.

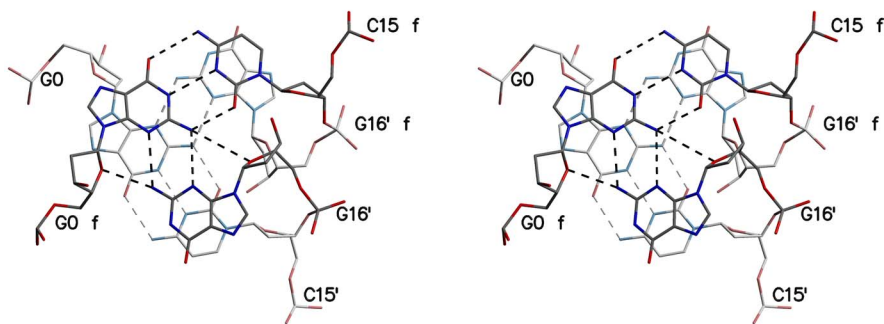

**Figure 11** Stereo view of G\*(G-C) base-triplets. Bases are numbered according to Figure 1, label (f) refers to free DNA. The black triplet is closer to the viewer than the light grey one.

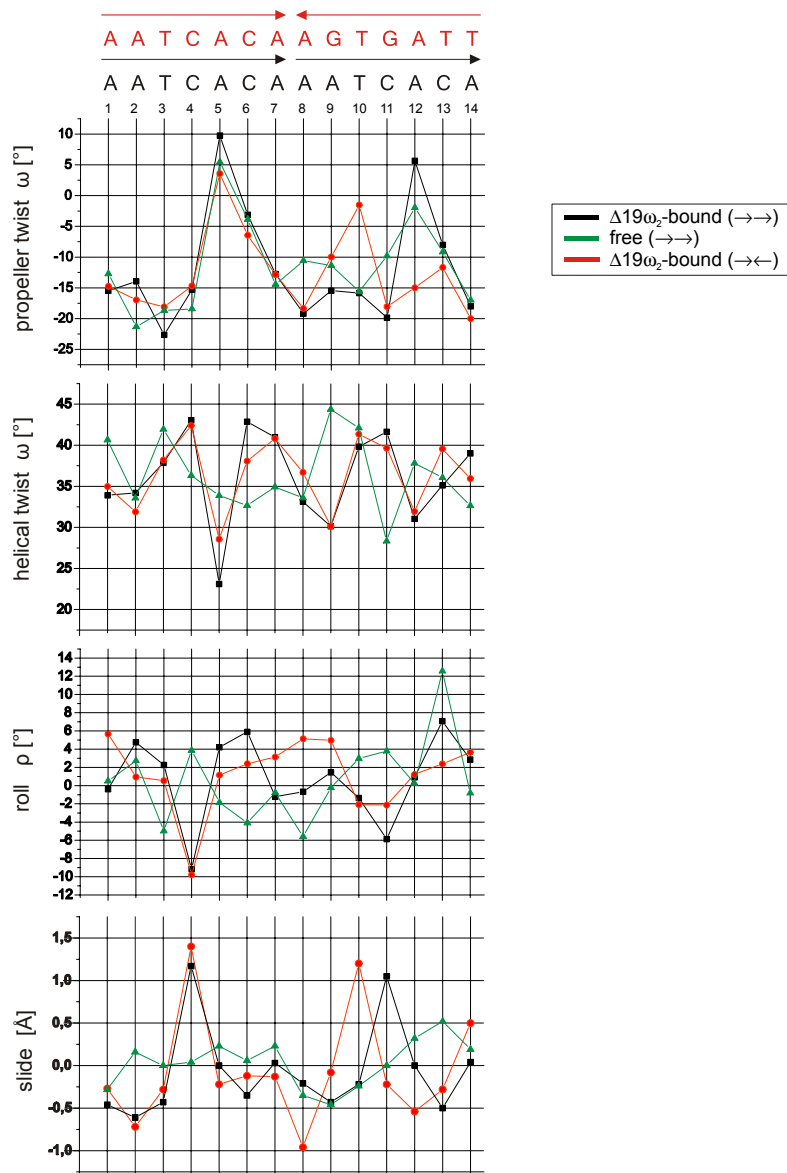

**Figure 12** DNA-parameters for  $[\Delta 19\omega_2]_2$ -bound and free DNA. Strong positive propeller twist is associated with opposite buckle in the CAC regions (see Figure 7). Parameters roll, slide and helical twist are similar in  $\Delta 19\omega_2$ -bound direct ( $\rightarrow\rightarrow$ ) and inverted ( $\rightarrow\leftarrow$ ) heptads, whereas patterns for heptads of free ( $\rightarrow\rightarrow$ ) do not correspond.

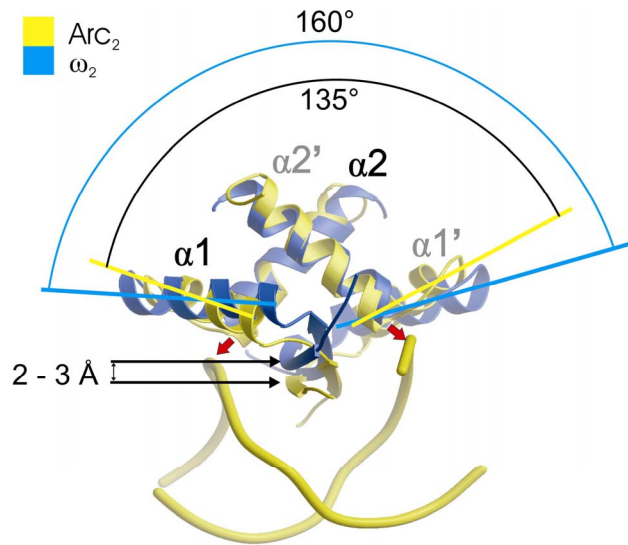

**Figure 13** Helices  $\alpha_2$  of repressors Arc<sub>2</sub> (yellow) and  $\omega_2$  (green) were superimposed to show that helices  $\alpha_1$  and the  $\beta$ -sheets have different orientations/positions in  $\omega_2$  and Arc<sub>2</sub>. Phosphate backbone DNA trace of Arc<sub>2</sub> is shown by thick yellow lines. Black arrows point at 2 – 3 Å separation between  $\beta$ -sheets while orange arrows indicate interactions between N-termini of helices  $\alpha_2$  and DNA phosphate groups. Blue and yellow lines indicate the inclination of helices  $\alpha_1$  of  $\omega_2$  and Arc<sub>2</sub>, respectively. Note that helices  $\alpha_1$  of Arc<sub>2</sub> are inclined by  $\sim 135^\circ$  to accommodate the bent DNA double helix.
